# Supplementary material for: Ultrathin γ-Al2O3 nanofibers with large specific surface area and their enhanced thermal stability by Si-doping
Source: Royal Society of Chemistry journal article supplement (doi:10.1039/c5ra08315j), 2015-01-01
Supplement: c5ra08315j1.pdf [file c5ra08315j1.pdf]

# Ultrathin $\gamma$ - $\text{Al}_2\text{O}_3$ nanofibers with large specific surface area and their enhanced thermal stability by Si-doping

Fang Hu,<sup>a</sup> Xiang Wu,<sup>ac</sup> Yamin Wang<sup>a</sup> and Xiaoyong Lai<sup>\*b</sup>

<sup>a</sup> School of Materials Science and Engineering, Shenyang University of Technology, Shenyang 110870, People's Republic of China

<sup>b</sup> Key Laboratory of Energy Resource and Chemical Engineering, State Key Laboratory Cultivation Base of Natural Gas Conversion, School of Chemistry and Chemical Engineering, Ningxia University, Yinchuan 750021, People's Republic of China

<sup>c</sup> College of Chemistry and Chemical Engineering, Harbin Normal University, Harbin 150025, People's Republic of China.

Address: State Key Laboratory Cultivation Base of Natural Gas Conversion, Ningxia University, No.539, Helan Mountain West Road, Xixia District, Yinchuan City, Ningxia, People's Republic of China; Postcode: 750021

Fax: +86 951 2062323; Tel: +86 951 2062861; E-mail: [xylai@nxu.edu.cn](mailto:xylai@nxu.edu.cn)

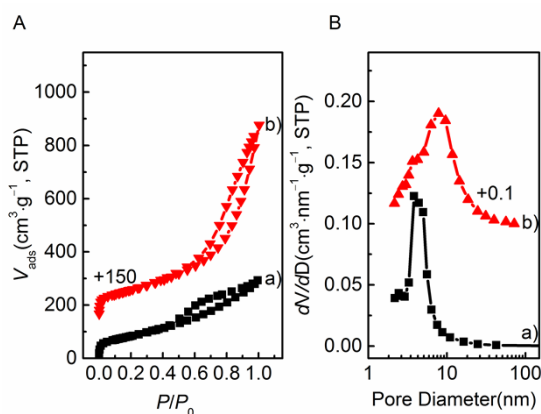

Fig. S1 (A) Nitrogen adsorption-desorption isotherms and (B) the corresponding pore size distribution curves of boehmite precursors obtained in different washing way: (a) using cool water (20 °C) and (b) using hot water (90 °C) and ethanol.

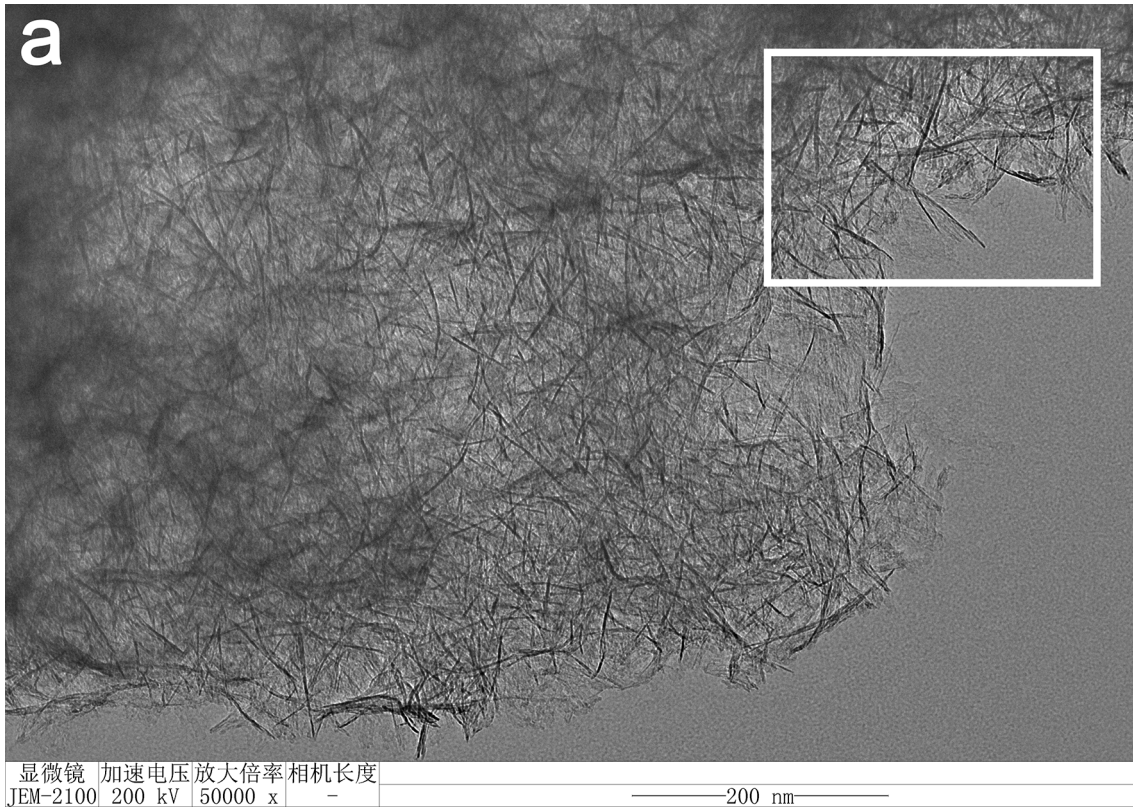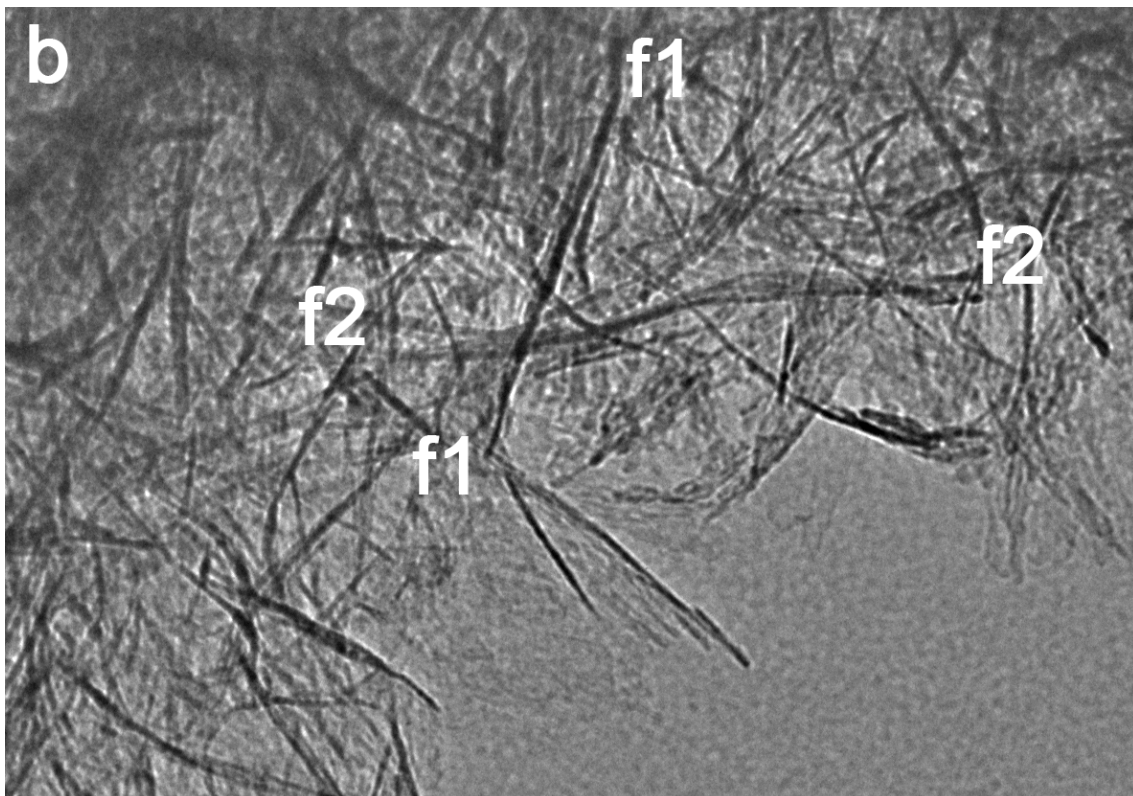

Fig. S2 (a) TEM image of alumina obtained after calcined at 500 °C and (b) its magnified image in (a).

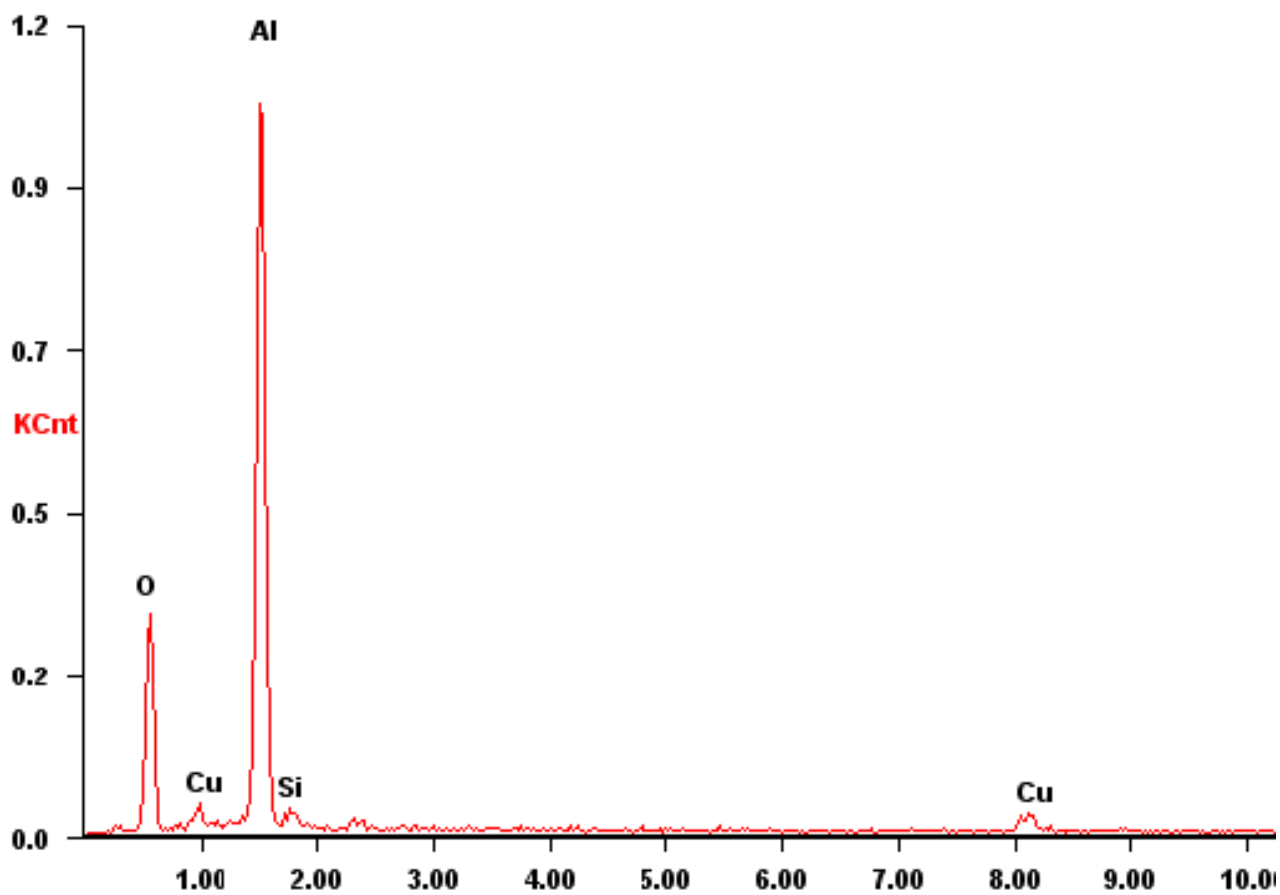

Fig. S3 EDX pattern of the Si-doped  $\gamma$ -Al<sub>2</sub>O<sub>3</sub> nanofiber SA6%. The signal of Cu is derived from the copper foil on which the Si-doped  $\gamma$ -Al<sub>2</sub>O<sub>3</sub> nanofibers are dispersed for SEM measurement.

**Table S1** Comparison of the thermal stability of various alumina.

| Products                                                     | Calcined temperature<br>(°C) | Specific surface area<br>(m <sup>2</sup> ·g <sup>-1</sup> ) | Pore volume<br>(cm <sup>3</sup> ·g <sup>-1</sup> ) | Reference |
|--------------------------------------------------------------|------------------------------|-------------------------------------------------------------|----------------------------------------------------|-----------|
| A-500                                                        | 500                          | 419                                                         | 1.60                                               |           |
| A-1000                                                       | 1000                         | 132                                                         | 0.91                                               |           |
| A-1100                                                       | 1100                         | 104                                                         | 0.55                                               | This work |
| A-1200                                                       | 1200                         | 70                                                          | 0.51                                               |           |
| SA-6%                                                        | 120A0                        | 113                                                         | 0.69                                               |           |
| Mesoporous $\gamma$ -Al <sub>2</sub> O <sub>3</sub>          | 1000                         | 116                                                         | 0.24                                               | 24        |
| La-doped mesoporous $\gamma$ -Al <sub>2</sub> O <sub>3</sub> | 1200                         | 101                                                         | 0.66                                               | 25        |
| $\gamma$ -Al <sub>2</sub> O <sub>3</sub> nanofibers          | 1200                         | 68                                                          | -                                                  | 30        |
| $\gamma$ -Al <sub>2</sub> O <sub>3</sub> nanofibers          | 1200                         | 41                                                          | 0.27                                               | 31        |
| La-doped $\gamma$ -Al <sub>2</sub> O <sub>3</sub> nanofibers | 1200                         | 71                                                          | 0.60                                               | 32        |
